# Supplementary material
Source: PubMed Central journal article supplement (PMC5016081)
Supplement: NIHMS784689-supplement-1.pdf [file NIHMS784689-supplement-1.pdf]

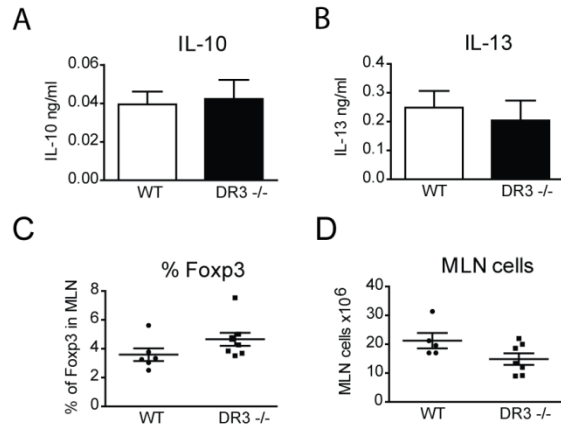

**SUPPLEMENTAL FIGURE 1. *Salmonella* infection in DR3<sup>-/-</sup> mice does not alter Th2 cytokine production or percentage of Fosp3<sup>+</sup> cells in MLN cells.** DR3<sup>-/-</sup> and WT mice were infected with *Salmonella enterica* serovar Typhimurium as described in Methods. *A, B*, Freshly isolated cells from the MLNs of DR3<sup>-/-</sup> (n=4) and WT (n=4) mice were cultured under stimulation with anti-CD3 and anti-CD28, and the concentrations of IL-10 and IL-13 protein were measured in the supernatants. *C*, Percentage of CD4<sup>+</sup>Fosp3<sup>+</sup> lymphocytes in MLNs from DR3<sup>-/-</sup> and WT mice after *Salmonella* infection. *D*, The total number of cells in MLNs in DR3<sup>-/-</sup> and WT mice after *Salmonella* infection. All data are expressed as mean ± SEM; \**P*<0.05.
